# Supplementary material for: Iron uptake by ZIP8 and ZIP14 in human proximal tubular epithelial cells
Source: PubMed Central journal article supplement (PMC6437295; doi:10.1007/s10534-019-00183-7), 2019-02-26
Supplement: 10534_2019_183_MOESM1_ESM.pdf [file 10534_2019_183_MOESM1_ESM.pdf]

## **Online Resources**

### **Iron uptake by ZIP8 and ZIP14 in human proximal tubular epithelial cells**

SEG van Raaij MSc<sup>a</sup>, SKS Srai PhD<sup>b</sup>, DW Swinkels MD, PhD<sup>a</sup>, RPL van Swelm PhD<sup>a\*</sup>

<sup>a</sup>Department of Laboratory Medicine, Radboud Institute for Molecular Life Sciences, Radboud university medical center, Nijmegen, the Netherlands; <sup>b</sup>Department of Structural & Molecular Biology, Division of Biosciences, University College London, London, United Kingdom; \*corresponding author

**Corresponding author:** RPL van Swelm, PhD, [Rachel.vanSwelm@Radboudumc.nl](mailto:Rachel.vanSwelm@Radboudumc.nl)

Online Resource 1: Overview used primary antibodies

| <b>Protein</b> | <b>Primary antibody</b>                                                                                                        |
|----------------|--------------------------------------------------------------------------------------------------------------------------------|
| TfR1           | Thermo Fisher Scientific 136800, 1:500                                                                                         |
| ZIP8           | ProteinTech 20459-1-AP, 1:500                                                                                                  |
| ZIP14          | Atlas Antibodies HPA016508, 1:500                                                                                              |
| DMT1           | Abcam ab55735, 1:350                                                                                                           |
| ZO-1           | Invitrogen 402200, 1:100                                                                                                       |
| EEA1           | Abcam ab2900, 1:1000 (immunoblot and immunostaining with DMT1)<br>Abcam ab70521, 1:200 (immunostaining with TfR1, ZIP8, ZIP14) |
| Na K ATPase    | Koenderink lab, 1:2500 (Koenderink et al. 2003)                                                                                |
| Total ferritin | Sigma Aldrich F5012, 1:250                                                                                                     |
| Ferroportin    | Abcam ab85370, 1:100                                                                                                           |
| β-actin        | Sigma Aldrich A5441, 1:100,000                                                                                                 |

*DMT1, divalent metal transporter 1; EEA1, early endosome antigen 1; TfR1, transferrin receptor 1; ZO-1, Zona occludens 1.*

Online Resource 2: Overview used quantitative PCR primers

| <b>Protein</b> | <b>Forward primer (5' - 3')</b> | <b>Reverse primer (5' - 3')</b> |
|----------------|---------------------------------|---------------------------------|
| TfR1           | CCCAGTTGCTGTCCTGATATAGA         | TTGAGAAAACAATGCAAATGTG          |
| ZIP8           | TTATCTCTGTCCCCCTTTGTCTC         | CGCCTTCGAAAGAACAGCAG            |
| ZIP14          | CTGGACCACATGATTCCTCAG           | GAGTAGCGGACACCTCCAG             |
| DMT1           | ATGGCCCTCACATTTGGATA            | CGAACATGCCCTTGAGTACC            |
| Ferroportin    | GGGTGCCTAGTGTCAT                | CAGGTAGTCGGCCAAGGAT             |
| HPRT           | GCTATAAATTCTTTGCTGACCTGCTG      | AATTACTTTTATGTCCCCTGTTGACTGG    |

*DMT1, divalent metal transporter 1; HPRT, Hypoxanthine-guanine phosphoribosyltransferase; TfR1, transferrin receptor 1.*

**References**

Koenderink JB, Geibel S, Grabsch E, De Pont JJ, Bamberg E, Friedrich T (2003) Electrophysiological analysis of the mutated Na,K-ATPase cation binding pocket *The Journal of biological chemistry* 278:51213-51222 doi:10.1074/jbc.M306384200
